# Supplementary material
Source: HighWire-hosted journal article supplement (https://bmjopen.bmj.com/content/14/8/e081571)
Supplement: inline-supplementary-material-2 [file inline-supplementary-material-2.pdf]

### Extraction items

Extraction items informed by the steering group are in **bold**

Overarching study information: Speech or language; title; author; year; country; language the intervention was in; study design; comparator of interest; no. participants; overarching study aim; outcome of relevance to this review.

Participant information: Age at baseline; sex; languages spoken; ethnicity; SES details; assessments used to identify their SSD/DLD features; phonological SSD subtype; how phonological SSD subtype indicated; **how bi/multi lingual children are assessed; previous speech and language therapy; family history; time in nursery; attention and listening levels.**

Intervention information: Setting; techniques; rationale; implicit or explicit; activities; dose frequency of the intervention; total duration of the intervention; dose frequency of techniques; total duration of the technique; other dosage information; technique deliverer; how deliverer is supported if non-professional; **flexibility of deliverer; how it was decided that the intervention was right for the child/family; was the intervention in the child's home language; how were parents supported; child's view of the intervention; if more than one deliverer, how were intervention tasks delegated.**

Outcomes information: Summary of exact outcome; measures used; timepoint/s; reported effect; direction of effect

Metabias: Registered protocol; if yes-was it registered prior to recruiting participants; if no-do the methods and results sections of the paper align.
