# Supplementary material
Source: HighWire-hosted journal article supplement (https://bmjopen.bmj.com/content/14/8/e081571)
Supplement: inline-supplementary-material-3 [file inline-supplementary-material-3.pdf]

Adapted GRIPP 2 Short Form

| Section and item                                                                                                                                                                   | Where stated within the article                                                                                                                                                                                                                                                           | Further elaboration/additional information                                                                                              |
|------------------------------------------------------------------------------------------------------------------------------------------------------------------------------------|-------------------------------------------------------------------------------------------------------------------------------------------------------------------------------------------------------------------------------------------------------------------------------------------|-----------------------------------------------------------------------------------------------------------------------------------------|
| <b>Aim:</b> Aim of PPI in the study                                                                                                                                                | To enhance social validity, make more relevant to the 'real world' (PPI section).                                                                                                                                                                                                         | N/A                                                                                                                                     |
| <b>Methods:</b> Clear description of the methods used for PPI in the study                                                                                                         | Each steering group member had one to one meetings with the researcher as well as two whole group meetings which consisted of discussion and brainstorming (PPI section).                                                                                                                 | N/A                                                                                                                                     |
| <b>Study results:</b> Outcomes—reported results of PPI in the study, including positive and negative outcomes                                                                      | Creation of a shared extraction form, synthesis incorporates real world issues as well as those found in the literature (PPI and methodology sections).<br><br>Enabled commentary, reflection and action following the group discussions (PPI, results, and discussion sections).         | The steering group raised many discussion points, due to time restraints these had to be prioritised.                                   |
| <b>Discussion and conclusions:</b> Outcomes—Comment on the extent to which PPI influenced the study overall. Describe positive and negative effects                                | Supported with the extraction form and analysis. Pre-study PPI informed the outcomes (PPI and methodology sections).<br><br>The following was raised by the steering group- attention and listening, the child's perspective, social and cultural validity (PPI and discussion sections). | Negative effects- unable to extract information of importance to the steering group as often this was missing from the included papers. |
| <b>Reflections/critical perspective:</b> Comment critically on the study, reflecting on the things that went well and those that did not, so others can learn from this experience | N/A                                                                                                                                                                                                                                                                                       | Potential for more in depth involvement at 'leading' level e.g. being trained up to lead on quality appraisal.                          |
