# Supplementary material
Source: HighWire-hosted journal article supplement (https://bmjopen.bmj.com/content/14/8/e081571)
Supplement: inline-supplementary-material-5 [file inline-supplementary-material-5.pdf]

Validity ratings

|                                                                                                                                                                                                                         | McGill<br>et al.<br>2020 | McLeod<br>et al.<br>2017 | Yoder<br>et al.<br>2005 | Gallagher<br>and Chiat,<br>2009 | Gibbard,<br>1994 | Girolametto<br>et al. 1996 | Kruythoff-<br>Broekman<br>et al. 2019 | Lavelli<br>et al.<br>2019 | Restrepo<br>et al.<br>2013 | Roberts<br>and<br>Kaiser<br>2012 | Roberts<br>and<br>Kaiser<br>2015 | Simon-<br>Cereijido,<br>and<br>Gutiérrez-<br>Clellen, 2014 | Thordardottir<br>et al. 2015 |
|-------------------------------------------------------------------------------------------------------------------------------------------------------------------------------------------------------------------------|--------------------------|--------------------------|-------------------------|---------------------------------|------------------|----------------------------|---------------------------------------|---------------------------|----------------------------|----------------------------------|----------------------------------|------------------------------------------------------------|------------------------------|
| PEDRO-P                                                                                                                                                                                                                 |                          |                          |                         |                                 |                  |                            |                                       |                           |                            |                                  |                                  |                                                            |                              |
| Eligibility criteria were specified                                                                                                                                                                                     | Yes                      | No                       | Yes                     | Yes                             | Yes              | Yes                        | Yes                                   | Yes                       | Yes                        | Yes                              | Yes                              | Yes                                                        | Yes                          |
| Subjects were randomly allocated to interventions                                                                                                                                                                       | Yes                      | No                       | Yes                     | Yes                             | Yes              | Yes                        | Yes                                   | No                        | Yes                        | Yes                              | Yes                              | No                                                         | Yes                          |
| Allocation was concealed                                                                                                                                                                                                | No                       | No                       | No                      | No                              | No               | No                         | No                                    | No                        | No                         | No                               | No                               | No                                                         | Yes                          |
| The intervention groups were similar at baseline regarding the most important prognostic factors                                                                                                                        | Yes                      | Yes                      | Yes                     | Yes                             | Yes              | Yes                        | Yes                                   | Yes                       | No                         | Yes                              | Yes                              | Yes                                                        | Yes                          |
| There was blinding of all subjects                                                                                                                                                                                      | No                       | No                       | No                      | No                              | No               | No                         | No                                    | No                        | No                         | No                               | No                               | No                                                         | No                           |
| There was blinding of all therapists who administered the therapy                                                                                                                                                       | No                       | No                       | No                      | No                              | No               | No                         | No                                    | No                        | No                         | No                               | No                               | No                                                         | No                           |
| There was blinding of all assessors who measured at least one key outcome                                                                                                                                               | No                       | No                       | No                      | Yes                             | No               | No                         | No                                    | Yes                       | No                         | No                               | No                               | No                                                         | Yes                          |
| Measures of at least one key outcome were obtained for more than 85% of the subjects initially allocated to groups                                                                                                      | Yes                      | Yes                      | Yes                     | Yes                             | Yes              | Yes                        | Yes                                   | Yes                       | Yes                        | Yes                              | Yes                              | Yes                                                        | Yes                          |
| All subjects for whom outcome measures were available received the treatment or control condition as allocated or, where this was not the case, data from at least one key outcome was analysed by "intention to treat" | Yes                      | Yes                      | Yes                     | Yes                             | Yes              | Yes                        | Yes                                   | Yes                       | Yes                        | Yes                              | Yes                              | Yes                                                        | Yes                          |

|                                                                                                             |     |     |     |     |     |     |     |     |     |     |     |     |     |
|-------------------------------------------------------------------------------------------------------------|-----|-----|-----|-----|-----|-----|-----|-----|-----|-----|-----|-----|-----|
| The results of between-intervention group statistical comparisons are reported for at least one key outcome | Yes | Yes | Yes | Yes | Yes | Yes | Yes | Yes | Yes | Yes | Yes | Yes | Yes |
| The study provides both point measures and measures of variability for at least one key outcome             | Yes | Yes | Yes | Yes | Yes | Yes | Yes | Yes | Yes | Yes | Yes | Yes | Yes |
| Total score                                                                                                 | 7   | 5   | 7   | 8   | 7   | 7   | 7   | 7   | 6   | 7   | 7   | 6   | 9   |

|                                                 | Combiths et al. 2021 | Craig-Unkefer and Kaiser 2003 | Petinou and Theodorou 2019 | Sugden et al. 2020 | Deveney et al. 2014 | Hatcher and Page, 2020 | McGregor et al. 2020 | Peredo et al. 2018 | Roberts et al. 2014 | Stanton-Chapman et al. 2008 | Weismer et al. 1993 |
|-------------------------------------------------|----------------------|-------------------------------|----------------------------|--------------------|---------------------|------------------------|----------------------|--------------------|---------------------|-----------------------------|---------------------|
| ROBINT                                          |                      |                               |                            |                    |                     |                        |                      |                    |                     |                             |                     |
| Design with control                             | 0                    | 0                             | 0                          | 1                  | 0                   | 0                      | 0                    | 0                  | 1                   | 0                           | 0                   |
| Randomisation                                   | 1                    | 0                             | 0                          | 1                  | 0                   | 0                      | 0                    | 0                  | 0                   | 0                           | 1                   |
| Sampling of behaviour                           | 1                    | 2                             | 0                          | 0                  | 1                   | 1                      | 0                    | 2                  | 1                   | 2                           | 1                   |
| Blinding of people involved in the intervention | 0                    | 0                             | 0                          | 0                  | 0                   | 0                      | 0                    | 0                  | 0                   | 0                           | 0                   |
| Blinding of assessors                           | 0                    | 0                             | 0                          | 0                  | 0                   | 0                      | 0                    | 0                  | 0                   | 0                           | 0                   |
| Interrater agreement                            | 2                    | 2                             | 0                          | 2                  | 2                   | 2                      | 0                    | 2                  | 2                   | 2                           | 1                   |
| Treatment adherence                             | 0                    | 2                             | 0                          | 2                  | 1                   | 2                      | 0                    | 2                  | 2                   | 2                           | 1                   |
| Baseline characteristics                        | 2                    | 2                             | 2                          | 2                  | 2                   | 2                      | 2                    | 2                  | 2                   | 2                           | 2                   |
| Setting                                         | 0                    | 2                             | 1                          | 1                  | 1                   | 2                      | 1                    | 2                  | 2                   | 2                           | 0                   |
| Dependent variable (target behaviour)           | 2                    | 2                             | 2                          | 2                  | 2                   | 2                      | 1                    | 2                  | 2                   | 2                           | 2                   |
| Independent variable (therapy/intervention)     | 1                    | 2                             | 0                          | 1                  | 2                   | 1                      | 2                    | 2                  | 2                   | 2                           | 1                   |
| Raw data record                                 | 0                    | 1                             | 0                          | 1                  | 0                   | 0                      | 1                    | 0                  | 0                   | 0                           | 0                   |
| Data analysis                                   | 2                    | 0                             | 0                          | 2                  | 2                   | 0                      | 0                    | 0                  | 0                   | 0                           | 1                   |

|                         |    |    |   |    |    |    |   |    |    |    |    |
|-------------------------|----|----|---|----|----|----|---|----|----|----|----|
| Replication             | 2  | 2  | 0 | 2  | 1  | 2  | 0 | 2  | 2  | 2  | 1  |
| Generalisation          | 2  | 1  | 0 | 1  | 2  | 0  | 0 | 2  | 2  | 1  | 0  |
| Internal validity score | 4  | 6  | 0 | 6  | 4  | 5  | 0 | 6  | 6  | 6  | 4  |
| External validity score | 11 | 12 | 3 | 12 | 12 | 9  | 7 | 12 | 12 | 11 | 7  |
| Total score             | 15 | 18 | 5 | 18 | 16 | 14 | 7 | 18 | 18 | 17 | 11 |
